# Supplementary material
Source: publisher figshare collection journal article supplement (https://acs.figshare.com/ndownloader/files/15123842)
Supplement: Supplementary file 1 [file 15123842]

## Sheet: Rep_1
Table S3. Lists of peptides issued from the constrained tryptic workflow.
Protein Accession	Peptide	Unique	-10lgP	Mass	ppm	m/z	z	RT	PTM
sp|Humira-HC|	K.SC(+57.02)DKTHTC(+57.02)PPC(+57.02)PAPELLGGPSVFLFPPKPK.D	N	200	3333.63	0.8	834.417	4	99.02	Carbamidomethylation
sp|Humira-HC|	K.THTC(+57.02)PPC(+57.02)PAPELLGGPSVFLFPPKPK.D	N	174.07	2843.45	-0.5	948.823	3	104.87	Carbamidomethylation
sp|Humira-HC|	R.QAPGKGLEWVSAITWNSGHIDYADSVEGR.F	Y	171.86	3142.51	1.3	786.636	4	102.65
sp|Humira-HC|	K.SC(+57.02)DKTHTC(+57.02)PPC(+57.02)PAPELLGGPSVFLFPPKPKDTLMISR.T	N	163.42	4150.05	1	831.018	5	106.13	Carbamidomethylation
sp|Humira-HC|	K.SC(+57.02)DKTHTC(+57.02)PPC(+57.02)PAPELLGGPSVFLFPPKPKDTLM(+15.99)ISR.T	N	157.73	4166.05	-0.1	834.216	5	103	Carbamidomethylation; Oxidation (M)
sp|Humira-HC|	K.VSYLSTASSLDYWGQGTLVTVSSASTK.G	Y	154.31	2807.39	0.2	1404.7	2	109.72
sp|Humira-HC|	K.VSYLSTASSLDYWGQGTLVTVSSASTKGPSVFPLAPSSK.S	Y	148.62	3975.02	2.9	994.764	4	125.95
sp|Humira-HC|	K.DYFPEPVTVSWNSGALTSGVHTFPAVLQSSGLYSLSSVVTVPSSSLGTQTYIC(+57.02)NVNHKPSNTK.V	N	148.54	6712.31	0.4	1343.47	5	163.61	Carbamidomethylation
sp|Humira-HC|	K.GFYPSDIAVEWESNGQPENNYK.T	N	144.09	2543.12	0.8	1272.57	2	93.04
sp|Humira-HC|	K.GFYPSDIAVEWESN(+.98)GQPENNYK.T	N	143.4	2544.11	0.6	1273.06	2	94.95	Deamidation (NQ)
sp|Humira-HC|	K.GLEWVSAITWNSGHIDYADSVEGR.F	Y	143.24	2661.25	0.5	888.09	3	155.41
sp|Humira-HC|	R.WQQGNVFSC(+57.02)SVMHEALHNHYTQK.S	N	142.19	2800.26	0.4	1401.14	2	68.78	Carbamidomethylation
sp|Humira-HC|	R.LSC(+57.02)AASGFTFDDYAMHWVR.Q	Y	140.08	2232.97	0.6	1117.49	2	102.34	Carbamidomethylation
sp|Humira-HC|	K.GFYPSDIAVEWESNGQPEN(+.98)NYK.T	N	135.06	2544.11	0.1	1273.06	2	94.44	Deamidation (NQ)
sp|Humira-HC|	R.LSC(+57.02)AASGFTFDDYAM(+15.99)HWVR.Q	Y	127.89	2248.97	0.3	1125.49	2	95.87	Carbamidomethylation; Oxidation (M)
sp|Humira-HC|	K.GFYPSDIAVEWESN(+.98)GQPEN(+.98)NYK.T	N	127.43	2545.09	2	1273.56	2	96.19	Deamidation (NQ)
sp|Humira-HC|	R.TPEVTC(+57.02)VVVDVSHEDPEVK.F	N	126.6	2138.02	0	1070.02	2	69.12	Carbamidomethylation
sp|Humira-HC|	R.TPEVTC(+57.02)VVVDVSHEDPEVKFNWYVDGVEVHNAK.T	N	126.29	3796.8	0.9	760.369	5	164.27	Carbamidomethylation
sp|Humira-HC|	R.WQQGNVFSC(+57.02)SVM(+15.99)HEALHNHYTQK.S	N	125.73	2816.25	1.9	564.259	5	64.12	Carbamidomethylation; Oxidation (M)
sp|Humira-HC|	K.TTPPVLDSDGSFFLYSKLTVDKSR.W	N	119.99	2672.37	0.8	669.1	4	97.67
sp|Humira-HC|	K.DYFPEPVTVSWN(+.98)SGALTSGVHTFPAVLQSSGLYSLSSVVTVPSSSLGTQTYIC(+57.02)NVNHKPSNTK.V	N	119.27	6713.29	1.8	1119.89	6	141.59	Deamidation (NQ); Carbamidomethylation
sp|Humira-HC|	R.SLRLSC(+57.02)AASGFTFDDYAMHWVR.Q	Y	115.62	2589.19	-0.3	648.304	4	104.79	Carbamidomethylation
sp|Humira-HC|	R.WQQGN(+.98)VFSC(+57.02)SVMHEALHNHYTQK.S	N	113.34	2801.24	0.9	934.756	3	72.74	Deamidation (NQ); Carbamidomethylation
sp|Humira-HC|	R.WQQGNVFSC(+57.02)SVMHEALHN(+.98)HYTQK.S	N	113.15	2801.24	4.3	701.321	4	70.03	Carbamidomethylation; Deamidation (NQ)
sp|Humira-HC|	K.THTC(+57.02)PPC(+57.02)PAPELLGGPSVFLFPPKPKDTLMISR.T	N	111.85	3659.87	-0.7	732.98	5	110.14	Carbamidomethylation
sp|Humira-HC|	R.WQQ(+.98)GNVFSC(+57.02)SVMHEALHNHYTQK.S	N	109.26	2801.24	3.8	701.321	4	71.79	Deamidation (NQ); Carbamidomethylation
sp|Humira-HC|	R.DNAKNSLYLQMNSLRAEDTAVYYC(+57.02)AK.V	Y	108.86	3037.43	0	760.364	4	82.91	Carbamidomethylation
sp|Humira-HC|	K.NSLYLQMNSLRAEDTAVYYC(+57.02)AK.V	Y	108.54	2609.23	1.4	870.75	3	85.14	Carbamidomethylation
sp|Humira-HC|	R.EPQVYTLPPSRDELTK.N	N	108.27	1871.96	1.4	936.99	2	52.33
sp|Humira-HC|	K.TTPPVLDSDGSFFLYSK.L	N	107.06	1872.91	0.6	937.465	2	97.43
sp|Humira-HC|	EVQLVESGGGLVQPGRSLRLSC(+57.02)AASGFTFDDYAMHWVR.Q	Y	104.81	4195.04	-0.2	840.014	5	114.34	Carbamidomethylation
sp|Humira-HC|	K.THTC(+57.02)PPC(+57.02)PAPELLGGPSVFLFPPKPKDTLM(+15.99)ISR.T	N	104.63	3675.86	1.1	736.18	5	106.68	Carbamidomethylation; Oxidation (M)
sp|Humira-HC|	EVQLVESGGGLVQPGR.S	Y	104.46	1623.86	1.3	542.294	3	55.81
sp|Humira-HC|	K.DYFPEPVTVSWNSGALTSGVHTFPAVLQ(+.98)SSGLYSLSSVVTVPSSSLGTQTYIC(+57.02)NVNHKPSNTK.V	N	101.04	6713.29	3.3	960.052	7	141.09	Deamidation (NQ); Carbamidomethylation
sp|Humira-HC|	K.DYFPEPVTVSWNSGALTSGVHTFPAVLQSSGLYSLSSVVTVPSSSLGTQTYIC(+57.02)NVN(+.98)HKPSNTK.V	N	100.35	6713.29	2.1	960.051	7	141.44	Carbamidomethylation; Deamidation (NQ)
sp|Humira-HC|	K.DYFPEPVTVSWN(+.98)SGALTSGVHTFPAVLQ(+.98)SSGLYSLSSVVTVPSSSLGTQTYIC(+57.02)NVNHKPSNTK.V	N	98.95	6714.27	-0.1	747.038	9	141.01	Deamidation (NQ); Carbamidomethylation
sp|Humira-HC|	R.VVSVLTVLHQDWLN(+.98)GK.E	N	98.3	1807.98	0.9	905	2	110.31	Deamidation (NQ)
sp|Humira-HC|	R.EPQVYTLPPSRDELTKNQVSLTC(+57.02)LVK.G	N	98.11	3014.57	1.4	754.652	4	85.72	Carbamidomethylation
sp|Humira-HC|	K.NSLYLQMNSLR.A	Y	97.82	1337.68	0.4	669.846	2	68.02
sp|Humira-HC|	K.GPSVFPLAPSSK.S	N	97.33	1185.64	0.8	593.827	2	59.39
sp|Humira-HC|	R.WQQGNVFSC(+57.02)SVM(+15.99)HEALHN(+.98)HYTQK.S	N	96.89	2817.24	0.9	705.318	4	53.59	Carbamidomethylation; Oxidation (M); Deamidation (NQ)
sp|Humira-HC|	R.VVSVLTVLHQDWLN(+.98)GKEYK.C	N	95.66	2228.18	0.5	743.736	3	105.33	Deamidation (NQ)
sp|Humira-HC|	K.DYFPEPVTVSWNSGALTSGVHTFPAVLQSSGLYSLSSVVTVPSSSLGTQ(+.98)TYIC(+57.02)NVNHKPSNTK.V	N	95.42	6713.29	4.9	1343.67	5	141.89	Deamidation (NQ); Carbamidomethylation
sp|Humira-HC|	K.GPSVFPLAPSSKSTSGGTAALGC(+57.02)LVK.D	N	91.96	2488.3	4	830.444	3	88.92	Carbamidomethylation
sp|Humira-HC|	K.STSGGTAALGC(+57.02)LVK.D	N	91.51	1320.67	0.5	661.343	2	48.59	Carbamidomethylation
sp|Humira-HC|	R.DELTKNQVSLTC(+57.02)LVK.G	N	91.18	1746.92	2.4	583.315	3	66.29	Carbamidomethylation
sp|Humira-HC|	K.N(+.98)SLYLQMNSLR.A	Y	90.13	1338.66	1.2	670.338	2	75.39	Deamidation (NQ)
sp|Humira-HC|	R.VVSVLTVLHQDWLNGKEYK.C	N	89.62	2227.2	-1	743.407	3	103.44
sp|Humira-HC|	R.EPQVYTLPPSR.D	N	88.36	1285.67	0.2	643.841	2	45.81
sp|Humira-HC|	R.AEDTAVYYC(+57.02)AK.V	Y	88.16	1289.56	0.5	645.788	2	25.22	Carbamidomethylation
sp|Humira-HC|	R.WQQGNVFSC(+57.02)SVMHEALHNHYTQ(+.98)K.S	N	87.51	2801.24	3.6	701.321	4	70.91	Carbamidomethylation; Deamidation (NQ)
sp|Humira-HC|	K.NSLYLQM(+15.99)NSLR.A	Y	86.58	1353.67	0.5	677.843	2	57.67	Oxidation (M)
sp|Humira-HC|	R.DNAKN(+.98)SLYLQMNSLR.A	Y	84.94	1766.86	1	589.962	3	63.41	Deamidation (NQ)
sp|Humira-HC|	K.NQVSLTC(+57.02)LVKGFYPSDIAVEWESNGQPENNYK.T	N	84.31	3685.74	-3.2	1229.58	3	123.03	Carbamidomethylation
sp|Humira-HC|	K.NSLYLQMN(+.98)SLR.A	Y	84.24	1338.66	1.3	670.338	2	65.41	Deamidation (NQ)
sp|Humira-HC|	EVQ(+.98)LVESGGGLVQPGR.S	Y	83.69	1624.84	2.6	542.623	3	58.43	Deamidation (NQ)
sp|Humira-HC|	R.TPEVTC(+57.02)VVVDVSHEDPEVKFN(+.98)WYVDGVEVHNAK.T	N	83.29	3797.79	4.2	1266.94	3	163.96	Carbamidomethylation; Deamidation (NQ)
sp|Humira-HC|	K.NSLYLQM(+15.99)N(+.98)SLR.A	Y	83.02	1354.66	0.2	678.335	2	45.73	Oxidation (M); Deamidation (NQ)
sp|Humira-HC|	K.N(+.98)SLYLQMN(+.98)SLR.A	Y	82.57	1339.64	0.3	670.83	2	71.76	Deamidation (NQ)
sp|Humira-HC|	K.N(+.98)SLYLQM(+15.99)NSLR.A	Y	79.27	1354.66	1	678.336	2	65.1	Deamidation (NQ); Oxidation (M)
sp|Humira-HC|	K.NQVSLTC(+57.02)LVK.G	N	78.01	1160.62	2.3	581.32	2	56.96	Carbamidomethylation
sp|Humira-HC|	K.GFYPSDIAVEWESNGQ(+.98)PENNYK.T	N	77.91	2544.11	1.4	849.045	3	163.65	Deamidation (NQ)
sp|Humira-HC|	K.DYFPEPVTVSWNSGALTSGVHTFPAVLQSSGLYSLSSVVTVPSSSLGTQTYIC(+57.02)N(+.98)VNHKPSNTK.V	N	77.49	6713.29	-0.4	960.048	7	141.8	Carbamidomethylation; Deamidation (NQ)
sp|Humira-HC|	K.NSLYLQ(+.98)MNSLR.A	Y	77.25	1338.66	1.2	670.338	2	73	Deamidation (NQ)
sp|Humira-HC|	K.GQPREPQVYTLPPSRDELTK.N	N	77	2310.2	0.4	578.557	4	49.21
sp|Humira-HC|	R.VVSVLTVLHQDWLNGK.E	N	75.51	1807	0.3	603.341	3	110.15
sp|Humira-HC|	K.TTPPVLDSDGSFFLYSKLTVDK.S	N	74.53	2429.24	-0.4	810.753	3	105.87
sp|Humira-HC|	K.VSNKALPAPIEK.T	N	71.35	1265.73	0.5	422.919	3	25.26
sp|Humira-HC|	EVQLVESGGGLVQPGRSLR.L	Y	69.3	1980.08	0.4	661.033	3	61.09
sp|Humira-HC|	K.DTLMISRTPEVTC(+57.02)VVVDVSHEDPEVKFN(+.98)WYVDGVEVHNAK.T	N	69.27	4614.2	4.2	923.852	5	163.72	Carbamidomethylation; Deamidation (NQ)
sp|Humira-HC|	K.N(+.98)SLYLQ(+.98)M(+15.99)NSLR.A	Y	69.2	1355.64	1.2	678.828	2	63.54	Deamidation (NQ); Oxidation (M)
sp|Humira-HC|	R.DELTKN(+.98)QVSLTC(+57.02)LVK.G	N	69	1747.9	2.2	583.643	3	67.57	Deamidation (NQ); Carbamidomethylation
sp|Humira-HC|	K.NSLYLQ(+.98)M(+15.99)NSLR.A	Y	68.9	1354.66	3.4	678.337	2	62.23	Deamidation (NQ); Oxidation (M)
sp|Humira-HC|	K.GFYPSDIAVEWESN(+.98)GQ(+.98)PENNYK.T	N	67.83	2545.09	3.1	1273.56	2	96.76	Deamidation (NQ)
sp|Humira-HC|	K.ALPAPIEK.T	N	67.7	837.496	0.1	419.755	2	34.07
sp|Humira-HC|	R.EEQYN(+1444.53)STYRVVSVLTVLHQDWLNGK.E	N	67.56	4422.03	1.8	1106.52	4	115.42	Fucosylated biantennary (-2 galactose)
sp|Humira-HC|	K.NQ(+.98)VSLTC(+57.02)LVK.G	N	66.37	1161.61	0.8	581.811	2	60.72	Deamidation (NQ); Carbamidomethylation
sp|Humira-HC|	K.N(+.98)SLYLQM(+15.99)N(+.98)SLR.A	Y	65.87	1355.64	0.2	678.827	2	63.31	Deamidation (NQ); Oxidation (M)
sp|Humira-HC|	K.FNWYVDGVEVHNAK.T	N	65.7	1676.79	-0.5	839.404	2	75.25
sp|Humira-HC|	K.DTLMISRTPEVTC(+57.02)VVVDVSHEDPEVKFNWYVDGVEVHNAK.T	N	65.63	4613.22	1.2	923.653	5	164.08	Carbamidomethylation
sp|Humira-HC|	R.DELTKN(+.98)QVSLTC(+57.02)LVKGFYPSDIAVEWESNGQPENNYK.T	N	65.42	4273.02	-3.2	1069.26	4	123.31	Deamidation (NQ); Carbamidomethylation
sp|Humira-HC|	K.GFYPSDIAVEWESNGQPENNYKTTPPVLDSDGSFFLYSK.L	N	64.3	4398.03	1.7	1100.52	4	125.18
sp|Humira-HC|	R.VVSVLTVLHQDWLNGKEYKC(+57.02)K.V	N	63.49	2515.33	0.3	504.073	5	96	Carbamidomethylation
sp|Humira-HC|	K.DTLMISR.T	N	62.7	834.427	0.9	418.221	2	39.41
sp|Humira-HC|	K.DTLMISRTPEVTC(+57.02)VVVDVSHEDPEVK.F	N	62.08	2954.44	2	739.618	4	90.34	Carbamidomethylation
sp|Humira-HC|	K.ALPAPIEKTISK.A	N	61.33	1266.75	1	634.385	2	43.97
sp|Humira-HC|	R.VVSVLTVLHQDWLN(+.98)GKEYKC(+57.02)K.V	N	58.73	2516.31	1	630.085	4	97.82	Deamidation (NQ); Carbamidomethylation
sp|Humira-HC|	R.DELTKNQ(+.98)VSLTC(+57.02)LVK.G	N	58.3	1747.9	1.1	583.642	3	67.74	Deamidation (NQ); Carbamidomethylation
sp|Humira-HC|	R.QAPGKGLEWVSAITWN(+.98)SGHIDYADSVEGR.F	Y	56.11	3143.49	4.4	786.885	4	104.22	Deamidation (NQ)
sp|Humira-HC|	R.EEQYN(+1444.53)STYRVVSVLTVLHQDWLNGKEYK.C	N	54.58	4842.23	-2.2	969.451	5	110.4	Fucosylated biantennary (-2 galactose)
sp|Humira-HC|	K.DTLM(+15.99)ISR.T	N	54.35	850.422	0.7	426.219	2	24.2	Oxidation (M)
sp|Humira-HC|	K.GQPREPQ(+.98)VYTLPPSRDELTK.N	N	53.02	2311.18	5	578.805	4	51.98	Deamidation (NQ)
sp|Humira-HC|	R.TPEVTC(+57.02)VVVDVSHEDPEVKFNWYVDGVEVHNAKTKPR.E	N	51.71	4279.1	-0.1	856.827	5	164.28	Carbamidomethylation
sp|Humira-HC|	K.VSYLSTASSLDYWGQ(+.98)GTLVTVSSASTK.G	Y	49.26	2808.37	4.8	703.103	4	114.49	Deamidation (NQ)
sp|Humira-HC|	R.EEQYN(+1444.53)STYRVVSVLTVLHQDWLN(+.98)GKEYK.C	N	47.25	4843.21	-1.5	969.648	5	110.05	Fucosylated biantennary (-2 galactose); Deamidation (NQ)
sp|Humira-HC|	K.VSN(+.98)KALPAPIEK.T	N	46.82	1266.72	-1.6	423.246	3	29.25	Deamidation (NQ)
sp|Humira-HC|	K.FN(+.98)WYVDGVEVHN(+.98)AK.T	N	46.58	1678.76	-1.6	840.387	2	75.44	Deamidation (NQ)
sp|Humira-HC|	R.LSC(+57.02)AASGFTFDDYAMHWVRQAPGKGLEWVSAITWNSGHIDYADSVEGR.F	Y	44.55	5357.47	1.2	893.92	6	137.99	Carbamidomethylation
sp|Humira-HC|	R.VVSVLTVLHQ(+.98)DWLNGK.E	N	41.81	1807.98	2.6	603.67	3	121.41	Deamidation (NQ)
sp|Humira-HC|	R.DN(+.98)AKNSLYLQM(+15.99)NSLR.A	Y	40.19	1782.86	3.1	595.295	3	52.71	Deamidation (NQ); Oxidation (M)
sp|Humira-HC|	K.NSLYLQM(+15.99)NSLRAEDTAVYYC(+57.02)AK.V	Y	39.2	2625.22	2.8	876.083	3	78.03	Oxidation (M); Carbamidomethylation
sp|Humira-HC|	EVQLVESGGGLVQ(+.98)PGRSLRLSC(+57.02)AASGFTFDDYAM(+15.99)HWVR.Q	Y	39.11	4212.02	2.7	843.413	5	109.94	Deamidation (NQ); Carbamidomethylation; Oxidation (M)
sp|Humira-HC|	K.N(+.98)SLYLQ(+.98)MNSLR.A	Y	38.72	1339.64	2.1	670.831	2	81.18	Deamidation (NQ)
sp|Humira-LC|	R.FSGSGSGTDFTLTISSLQPEDVATYYC(+57.02)QR.Y	Y	166.94	3186.45	1.5	1594.23	2	111.11	Carbamidomethylation
sp|Humira-LC|	K.VDNALQSGNSQESVTEQDSKDSTYSLSSTLTLSK.A	N	152.45	3618.7	1.9	1207.24	3	71.52
sp|Humira-LC|	K.VYAC(+57.02)EVTHQGLSSPVTK.S	N	145.14	1874.92	-0.9	938.466	2	38.15	Carbamidomethylation
sp|Humira-LC|	K.VDNALQSGNSQESVTEQDSK.D	N	143.67	2134.96	-0.1	1068.49	2	20.35
sp|Humira-LC|	K.VDNALQSGN(+.98)SQESVTEQDSK.D	N	141.83	2135.95	1.3	1068.98	2	22.09	Deamidation (NQ)
sp|Humira-LC|	K.HKVYAC(+57.02)EVTHQGLSSPVTK.S	N	137.55	2140.07	-0.2	714.365	3	27.68	Carbamidomethylation
sp|Humira-LC|	K.VDN(+.98)ALQSGNSQESVTEQDSK.D	N	137.09	2135.95	0.5	1068.98	2	22.43	Deamidation (NQ)
sp|Humira-LC|	K.VDNALQSGNSQ(+.98)ESVTEQDSK.D	N	128.05	2135.95	1.4	1068.98	2	23.73	Deamidation (NQ)
sp|Humira-LC|	K.VQWKVDNALQSGNSQESVTEQDSK.D	N	126.66	2676.26	0.1	893.095	3	49.97
sp|Humira-LC|	DIQM(+15.99)TQSPSSLSASVGDR.V	N	126.48	1893.87	-0.5	947.944	2	49.42	Oxidation (M)
sp|Humira-LC|	K.VDNALQSGNSQESVTEQDSKDSTYSLSSTLTLSKADYEK.H	N	119.24	4224.97	0.6	1057.25	4	72.43
sp|Humira-LC|	K.SGTASVVC(+57.02)LLN(+.98)NFYPR.E	N	116.55	1797.87	0.3	899.943	2	93.62	Carbamidomethylation; Deamidation (NQ)
sp|Humira-LC|	R.TVAAPSVFIFPPSDEQLKSGTASVVC(+57.02)LLNNFYPR.E	N	116.27	3723.9	1.5	931.983	4	146.37	Carbamidomethylation
sp|Humira-LC|	DIQMTQSPSSLSASVGDR.V	N	116.21	1877.88	1	626.967	3	54
sp|Humira-LC|	K.VDNALQ(+.98)SGNSQESVTEQDSK.D	N	114.52	2135.95	0.5	1068.98	2	22.26	Deamidation (NQ)
sp|Humira-LC|	K.SGTASVVC(+57.02)LLNNFYPR.E	N	114.29	1796.89	0.7	899.452	2	114.76	Carbamidomethylation
sp|Humira-LC|	DIQM(+15.99)TQSPSSLSASVGDRVTITC(+57.02)R.A	N	113.65	2624.25	0.7	875.759	3	64.88	Oxidation (M); Carbamidomethylation
sp|Humira-LC|	K.SGTASVVC(+57.02)LLNN(+.98)FYPR.E	N	110.92	1797.87	-0.4	899.943	2	103.93	Carbamidomethylation; Deamidation (NQ)
sp|Humira-LC|	R.TVAAPSVFIFPPSDEQLK.S	N	110.72	1945.02	0.1	973.517	2	101.56
sp|Humira-LC|	K.VQWKVDNALQSGNSQESVTEQDSKDSTYSLSSTLTLSK.A	N	107.94	4160	1.6	1041.01	4	82.86
sp|Humira-LC|	R.NYLAWYQQKPGKAPKLLIYAASTLQSGVPSR.F	Y	106.78	3447.87	0.1	862.974	4	105.79
sp|Humira-LC|	K.DSTYSLSSTLTLSK.A	N	106.17	1501.75	1	751.884	2	62.88
sp|Humira-LC|	K.RTVAAPSVFIFPPSDEQLK.S	N	103.83	2101.12	1.8	701.382	3	92.13
sp|Humira-LC|	DIQMTQSPSSLSASVGDRVTITC(+57.02)R.A	N	103.54	2608.26	-0.2	870.427	3	163.28	Carbamidomethylation
sp|Humira-LC|	R.TVAAPSVFIFPPSDEQLKSGTASVVC(+57.02)LLNNFYPREAK.V	N	100.52	4052.07	1.8	1014.03	4	143.79	Carbamidomethylation
sp|Humira-LC|	R.N(+.98)YLAWYQQKPGK.A	Y	99.89	1495.75	0.8	748.881	2	64.97	Deamidation (NQ)
sp|Humira-LC|	DIQ(+.98)M(+15.99)TQSPSSLSASVGDR.V	N	98.18	1894.86	1.5	948.438	2	42.8	Deamidation (NQ); Oxidation (M)
sp|Humira-LC|	K.VYAC(+57.02)EVTHQ(+.98)GLSSPVTK.S	N	97.6	1875.9	4	626.311	3	41.97	Carbamidomethylation; Deamidation (NQ)
sp|Humira-LC|	R.NYLAWYQQKPGK.A	Y	94.51	1494.76	-0.5	748.388	2	52.43
sp|Humira-LC|	K.APKLLIYAASTLQSGVPSR.F	Y	94.37	1971.12	1.5	658.047	3	91.99
sp|Humira-LC|	K.LLIYAASTLQSGVPSR.F	Y	93.48	1674.93	0.2	838.473	2	78.45
sp|Humira-LC|	R.YNRAPYTFGQGTK.V	Y	92.13	1501.73	0.7	501.585	3	29.96
sp|Humira-LC|	K.ADYEKHKVYAC(+57.02)EVTHQGLSSPVTK.S	N	91.58	2746.34	0.4	687.592	4	36.98	Carbamidomethylation
sp|Humira-LC|	R.APYTFGQGTK.V	Y	86.35	1068.52	1.2	535.27	2	26.46
sp|Humira-LC|	K.SGTASVVC(+57.02)LLN(+.98)N(+.98)FYPR.E	N	85.97	1798.86	1.3	900.436	2	107.53	Carbamidomethylation; Deamidation (NQ)
sp|Humira-LC|	R.NYLAWYQQKPGKAPK.L	Y	83.72	1790.95	0.1	448.744	4	46.65
sp|Humira-LC|	R.APYTFGQGTKVEIKR.T	Y	83.64	1693.91	0.7	424.486	4	40.41
sp|Humira-LC|	R.NYLAWYQQ(+.98)KPGK.A	Y	78.93	1495.75	1.6	748.881	2	54.9	Deamidation (NQ)
sp|Humira-LC|	R.APYTFGQ(+.98)GTK.V	Y	76.42	1069.51	0.9	535.762	2	28.89	Deamidation (NQ)
sp|Humira-LC|	R.NYLAWYQ(+.98)QKPGK.A	Y	75.41	1495.75	1.6	499.59	3	55.6	Deamidation (NQ)
sp|Humira-LC|	K.SGTASVVC(+57.02)LLNNFYPREAK.V	N	73.99	2125.06	2.9	709.364	3	104.26	Carbamidomethylation
sp|Humira-LC|	K.VDNALQSGNSQESVTEQ(+.98)DSKDSTYSLSSTLTLSK.A	N	69.67	3619.69	3.8	905.932	4	73.07	Deamidation (NQ)
sp|Humira-LC|	K.VYAC(+57.02)EVTHQGLSSPVTKSFNR.G	N	64.88	2379.16	0.6	595.799	4	49.73	Carbamidomethylation
sp|Humira-LC|	K.RTVAAPSVFIFPPSDEQLKSGTASVVC(+57.02)LLNNFYPR.E	N	64.71	3880	2.3	971.009	4	142.77	Carbamidomethylation
sp|Humira-LC|	R.ASQGIRNYLAWYQQKPGKAPK.L	Y	63.45	2403.28	0.5	601.828	4	60.56
sp|Humira-LC|	R.ASQGIRNYLAWYQQKPGK.A	Y	57.85	2107.1	3.8	527.783	4	66.11
sp|Humira-LC|	R.APYTFGQGTKVEIK.R	Y	57.85	1537.81	0	513.612	3	48.91
sp|Humira-LC|	R.ASQGIRN(+.98)YLAWYQQKPGK.A	Y	54.52	2108.08	1.3	528.028	4	62.61	Deamidation (NQ)
sp|Humira-LC|	K.VDNALQ(+.98)SGNSQESVTEQDSKDSTYSLSSTLTLSK.A	N	53.51	3619.69	2.1	905.931	4	155.2	Deamidation (NQ)
sp|Humira-LC|	DIQMTQSPSSLSASVGDRVTITC(+57.02)RASQGIR.N	Y	51.37	3220.59	1.8	806.157	4	72.16	Carbamidomethylation
sp|Humira-LC|	R.YNRAPYTFGQGTKVEIK.R	Y	51.14	1971.02	0	493.763	4	47.62
sp|Humira-LC|	DIQMTQ(+.98)SPSSLSASVGDR.V	N	50.71	1878.86	-2.2	940.437	2	93.47	Deamidation (NQ)
sp|Humira-LC|	R.YN(+.98)RAPYTFGQGTK.V	Y	46.39	1502.72	-2.1	501.911	3	32.37	Deamidation (NQ)
sp|Humira-LC|	DIQ(+.98)MTQSPSSLSASVGDRVTITC(+57.02)R.A	N	43.16	2609.24	1.3	870.756	3	84.97	Deamidation (NQ); Carbamidomethylation
sp|Humira-LC|	DIQMTQ(+.98)SPSSLSASVGDRVTITC(+57.02)R.A	N	38.98	2609.24	0.7	870.755	3	103.5	Deamidation (NQ); Carbamidomethylation

## Sheet: Rep_2
Table S3. Lists of peptides issued from the constrained tryptic workflow.
Protein Accession	Peptide	Unique	-10lgP	Mass	ppm	m/z	z	RT	PTM
sp|Humira-HC|	K.SC(+57.02)DKTHTC(+57.02)PPC(+57.02)PAPELLGGPSVFLFPPKPK.D	N	200	3333.63	0.4	834.416	4	99.14	Carbamidomethylation
sp|Humira-HC|	K.THTC(+57.02)PPC(+57.02)PAPELLGGPSVFLFPPKPK.D	N	200	2843.45	-1.1	948.823	3	103.34	Carbamidomethylation
sp|Humira-HC|	K.SC(+57.02)DKTHTC(+57.02)PPC(+57.02)PAPELLGGPSVFLFPPKPKDTLM(+15.99)ISR.T	N	172.37	4166.05	-1.1	834.216	5	102.84	Carbamidomethylation; Oxidation (M)
sp|Humira-HC|	K.SC(+57.02)DKTHTC(+57.02)PPC(+57.02)PAPELLGGPSVFLFPPKPKDTLMISR.T	N	164.54	4150.05	-0.7	831.017	5	106.12	Carbamidomethylation
sp|Humira-HC|	K.VSYLSTASSLDYWGQGTLVTVSSASTKGPSVFPLAPSSK.S	Y	163.33	3975.02	-0.6	994.76	4	125.84
sp|Humira-HC|	R.QAPGKGLEWVSAITWNSGHIDYADSVEGR.F	Y	157.38	3142.51	-1.9	786.634	4	102.72
sp|Humira-HC|	R.WQQGNVFSC(+57.02)SVMHEALHNHYTQK.S	N	153.83	2800.26	-0.8	1401.14	2	68.84	Carbamidomethylation
sp|Humira-HC|	K.DYFPEPVTVSWNSGALTSGVHTFPAVLQSSGLYSLSSVVTVPSSSLGTQTYIC(+57.02)NVNHKPSNTK.V	N	150.2	6712.31	0	1119.73	6	140.96	Carbamidomethylation
sp|Humira-HC|	K.GLEWVSAITWNSGHIDYADSVEGR.F	Y	147.01	2661.25	0.4	888.09	3	124.37
sp|Humira-HC|	K.GFYPSDIAVEWESN(+.98)GQPENNYK.T	N	143.05	2544.11	-0.3	1273.06	2	94.83	Deamidation (NQ)
sp|Humira-HC|	K.GFYPSDIAVEWESNGQPENNYK.T	N	140.29	2543.12	-0.2	1272.57	2	93.05
sp|Humira-HC|	K.THTC(+57.02)PPC(+57.02)PAPELLGGPSVFLFPPKPKDTLMISR.T	N	139.73	3659.87	1.7	915.975	4	109.93	Carbamidomethylation
sp|Humira-HC|	R.LSC(+57.02)AASGFTFDDYAMHWVR.Q	Y	137.06	2232.97	-0.7	1117.49	2	102.4	Carbamidomethylation
sp|Humira-HC|	R.SLRLSC(+57.02)AASGFTFDDYAMHWVR.Q	Y	129.94	2589.19	-1.8	648.303	4	104.91	Carbamidomethylation
sp|Humira-HC|	K.GFYPSDIAVEWESNGQPEN(+.98)NYK.T	N	127.87	2544.11	3.7	1273.07	2	93.41	Deamidation (NQ)
sp|Humira-HC|	R.WQQGN(+.98)VFSC(+57.02)SVMHEALHNHYTQK.S	N	126.36	2801.24	1.2	701.319	4	72.88	Deamidation (NQ); Carbamidomethylation
sp|Humira-HC|	R.TPEVTC(+57.02)VVVDVSHEDPEVK.F	N	124.43	2138.02	-0.8	1070.02	2	69.27	Carbamidomethylation
sp|Humira-HC|	R.LSC(+57.02)AASGFTFDDYAM(+15.99)HWVR.Q	Y	122.17	2248.97	-0.8	1125.49	2	95.48	Carbamidomethylation; Oxidation (M)
sp|Humira-HC|	R.WQQGNVFSC(+57.02)SVMHEALHNHYTQ(+.98)K.S	N	121.64	2801.24	2.4	701.32	4	70.97	Carbamidomethylation; Deamidation (NQ)
sp|Humira-HC|	K.NSLYLQMNSLRAEDTAVYYC(+57.02)AK.V	Y	116.9	2609.23	2.2	870.751	3	85.08	Carbamidomethylation
sp|Humira-HC|	K.GFYPSDIAVEWESN(+.98)GQPEN(+.98)NYK.T	N	115.84	2545.09	4.5	1273.56	2	94.12	Deamidation (NQ)
sp|Humira-HC|	R.WQQGNVFSC(+57.02)SVM(+15.99)HEALHNHYTQK.S	N	114.48	2816.25	0.5	705.071	4	62.4	Carbamidomethylation; Oxidation (M)
sp|Humira-HC|	K.VSYLSTASSLDYWGQGTLVTVSSASTK.G	Y	111.84	2807.39	0.1	1404.7	2	109.81
sp|Humira-HC|	R.WQQGNVFSC(+57.02)SVMHEALHN(+.98)HYTQK.S	N	111.53	2801.24	2.5	701.32	4	71.14	Carbamidomethylation; Deamidation (NQ)
sp|Humira-HC|	R.WQQ(+.98)GNVFSC(+57.02)SVMHEALHNHYTQK.S	N	110.82	2801.24	0.7	561.256	5	74.33	Deamidation (NQ); Carbamidomethylation
sp|Humira-HC|	R.EPQVYTLPPSRDELTK.N	N	107.69	1871.96	-0.3	936.989	2	52.68
sp|Humira-HC|	K.DYFPEPVTVSWN(+.98)SGALTSGVHTFPAVLQSSGLYSLSSVVTVPSSSLGTQTYIC(+57.02)NVNHKPSNTK.V	N	107.31	6713.29	2.9	1343.67	5	141.66	Deamidation (NQ); Carbamidomethylation
sp|Humira-HC|	K.THTC(+57.02)PPC(+57.02)PAPELLGGPSVFLFPPKPKDTLM(+15.99)ISR.T	N	106.55	3675.86	0.7	736.18	5	106.88	Carbamidomethylation; Oxidation (M)
sp|Humira-HC|	R.EPQVYTLPPSRDELTKNQVSLTC(+57.02)LVKGFYPSDIAVEWESNGQPENNYK.T	N	106.14	5539.69	0.6	1108.95	5	124.4	Carbamidomethylation
sp|Humira-HC|	K.TTPPVLDSDGSFFLYSK.L	N	105.16	1872.91	-0.5	937.464	2	96.09
sp|Humira-HC|	K.TTPPVLDSDGSFFLYSKLTVDKSRWQQGNVFSC(+57.02)SVMHEALHNHYTQK.S	N	104.91	5454.62	0.7	682.835	8	164.5	Carbamidomethylation
sp|Humira-HC|	R.VVSVLTVLHQDWLN(+.98)GK.E	N	103.14	1807.98	-1.3	904.998	2	112.74	Deamidation (NQ)
sp|Humira-HC|	EVQLVESGGGLVQPGR.S	Y	102.19	1623.86	0.2	812.937	2	57.13
sp|Humira-HC|	K.GPSVFPLAPSSKSTSGGTAALGC(+57.02)LVK.D	N	98.81	2488.3	1.1	830.441	3	88.92	Carbamidomethylation
sp|Humira-HC|	R.TPEVTC(+57.02)VVVDVSHEDPEVKFNWYVDGVEVHNAK.T	N	97.03	3796.8	-1.1	950.207	4	163.75	Carbamidomethylation
sp|Humira-HC|	R.VVSVLTVLHQDWLNGKEYK.C	N	94.88	2227.2	-1.6	743.406	3	103.84
sp|Humira-HC|	EVQ(+.98)LVESGGGLVQPGRSLRLSC(+57.02)AASGFTFDDYAMHWVR.Q	Y	94.85	4196.02	-0.7	840.211	5	114.47	Deamidation (NQ); Carbamidomethylation
sp|Humira-HC|	R.EPQVYTLPPSRDELTKNQVSLTC(+57.02)LVKGFYPSDIAVEWESN(+.98)GQPENNYK.T	N	93.99	5540.67	0.5	1109.14	5	123.88	Carbamidomethylation; Deamidation (NQ)
sp|Humira-HC|	R.VVSVLTVLHQDWLN(+.98)GKEYK.C	N	93.21	2228.18	0.1	743.735	3	106.55	Deamidation (NQ)
sp|Humira-HC|	K.GQPREPQVYTLPPSRDELTKNQVSLTC(+57.02)LVK.G	N	92.87	3452.81	-0.2	864.209	4	80.07	Carbamidomethylation
sp|Humira-HC|	K.NSLYLQMNSLR.A	Y	92.46	1337.68	-0.1	669.845	2	67.59
sp|Humira-HC|	K.GPSVFPLAPSSK.S	N	92.08	1185.64	-0.4	593.827	2	61.06
sp|Humira-HC|	K.STSGGTAALGC(+57.02)LVK.D	N	91.2	1320.67	-0.9	661.342	2	47.72	Carbamidomethylation
sp|Humira-HC|	K.N(+.98)SLYLQMNSLR.A	Y	91.17	1338.66	0.5	670.338	2	75.17	Deamidation (NQ)
sp|Humira-HC|	R.EPQVYTLPPSRDELTKNQVSLTC(+57.02)LVK.G	N	89.95	3014.57	1.8	754.652	4	84.53	Carbamidomethylation
sp|Humira-HC|	R.DELTKNQVSLTC(+57.02)LVK.G	N	89.84	1746.92	1.6	583.314	3	66.3	Carbamidomethylation
sp|Humira-HC|	K.DYFPEPVTVSWNSGALTSGVHTFPAVLQ(+.98)SSGLYSLSSVVTVPSSSLGTQTYIC(+57.02)NVNHKPSNTK.V	N	89.81	6713.29	1.1	840.17	8	140.83	Deamidation (NQ); Carbamidomethylation
sp|Humira-HC|	R.DELTKN(+.98)QVSLTC(+57.02)LVK.G	N	88.03	1747.9	1	583.642	3	67.56	Deamidation (NQ); Carbamidomethylation
sp|Humira-HC|	K.DYFPEPVTVSWNSGALTSGVHTFPAVLQSSGLYSLSSVVTVPSSSLGTQTYIC(+57.02)NVN(+.98)HKPSNTK.V	N	87.52	6713.29	2.7	1343.67	5	141.84	Carbamidomethylation; Deamidation (NQ)
sp|Humira-HC|	R.WQQGNVFSC(+57.02)SVM(+15.99)HEALHN(+.98)HYTQK.S	N	86.11	2817.24	2.8	705.319	4	53.42	Carbamidomethylation; Oxidation (M); Deamidation (NQ)
sp|Humira-HC|	R.AEDTAVYYC(+57.02)AK.V	Y	85.05	1289.56	0.5	645.788	2	24.79	Carbamidomethylation
sp|Humira-HC|	K.NSLYLQM(+15.99)NSLR.A	Y	84.93	1353.67	-0.3	677.843	2	58.41	Oxidation (M)
sp|Humira-HC|	R.DELTKNQVSLTC(+57.02)LVKGFYPSDIAVEWESNGQPENNYK.T	N	84.71	4272.03	-0.5	1069.01	4	123.3	Carbamidomethylation
sp|Humira-HC|	R.TPEVTC(+57.02)VVVDVSHEDPEVKFN(+.98)WYVDGVEVHNAK.T	N	83.63	3797.79	3.3	950.457	4	154.27	Carbamidomethylation; Deamidation (NQ)
sp|Humira-HC|	K.FNWYVDGVEVHNAK.T	N	83.42	1676.79	-1.3	839.404	2	68.1
sp|Humira-HC|	K.NSLYLQMN(+.98)SLR.A	Y	83.13	1338.66	0.1	670.337	2	65	Deamidation (NQ)
sp|Humira-HC|	K.FNWYVDGVEVHN(+.98)AK.T	N	82.1	1677.78	-1.1	839.896	2	72.99	Deamidation (NQ)
sp|Humira-HC|	K.GFYPSDIAVEWESNGQ(+.98)PENNYK.T	N	81.92	2544.11	1.7	849.045	3	163.13	Deamidation (NQ)
sp|Humira-HC|	R.EPQVYTLPPSR.D	N	80.95	1285.67	0.5	643.841	2	44.39
sp|Humira-HC|	EVQ(+.98)LVESGGGLVQPGR.S	Y	80.91	1624.84	1.7	813.43	2	58.34	Deamidation (NQ)
sp|Humira-HC|	EVQLVESGGGLVQPGRSLRLSC(+57.02)AASGFTFDDYAMHWVR.Q	Y	78.05	4195.04	-0.1	1049.77	4	114.37	Carbamidomethylation
sp|Humira-HC|	K.N(+.98)SLYLQM(+15.99)NSLR.A	Y	78.01	1354.66	-1.1	678.334	2	64.86	Deamidation (NQ); Oxidation (M)
sp|Humira-HC|	K.TTPPVLDSDGSFFLYSKLTVDKSR.W	N	77.36	2672.37	-0.8	669.099	4	97.88
sp|Humira-HC|	K.NSLYLQM(+15.99)N(+.98)SLR.A	Y	76.57	1354.66	1.4	678.336	2	53.9	Oxidation (M); Deamidation (NQ)
sp|Humira-HC|	K.N(+.98)SLYLQMN(+.98)SLR.A	Y	76.57	1339.64	-0.9	670.829	2	71.63	Deamidation (NQ)
sp|Humira-HC|	R.DNAKNSLYLQMNSLRAEDTAVYYC(+57.02)AK.V	Y	76.1	3037.43	0.6	760.365	4	82.93	Carbamidomethylation
sp|Humira-HC|	R.VVSVLTVLHQDWLNGK.E	N	75.84	1807	1.1	904.508	2	149.95
sp|Humira-HC|	EVQLVESGGGLVQPGRSLR.L	Y	75.32	1980.08	-0.5	661.032	3	60.99
sp|Humira-HC|	K.VSYLSTASSLDYWGQ(+.98)GTLVTVSSASTK.G	Y	75.11	2808.37	2	937.133	3	165.13	Deamidation (NQ)
sp|Humira-HC|	K.NSLYLQ(+.98)MNSLR.A	Y	73.29	1338.66	0	670.337	2	73	Deamidation (NQ)
sp|Humira-HC|	K.DTLMISRTPEVTC(+57.02)VVVDVSHEDPEVKFNWYVDGVEVHNAK.T	N	72.93	4613.22	-0.8	923.651	5	163.78	Carbamidomethylation
sp|Humira-HC|	K.VSNKALPAPIEK.T	N	72.74	1265.73	0.4	633.875	2	25.17
sp|Humira-HC|	K.NQVSLTC(+57.02)LVK.G	N	72.32	1160.62	-0.2	581.318	2	56.14	Carbamidomethylation
sp|Humira-HC|	K.GQPREPQVYTLPPSRDELTK.N	N	72.22	2310.2	0.2	578.557	4	50.84
sp|Humira-HC|	K.FN(+.98)WYVDGVEVHNAK.T	N	71.72	1677.78	4.1	839.9	2	66.71	Deamidation (NQ)
sp|Humira-HC|	K.DYFPEPVTVSWN(+.98)SGALTSGVHTFPAVLQ(+.98)SSGLYSLSSVVTVPSSSLGTQTYIC(+57.02)NVNHKPSNTK.V	N	70.73	6714.27	3.4	747.04	9	141.02	Deamidation (NQ); Carbamidomethylation
sp|Humira-HC|	K.GLEWVSAITWN(+.98)SGHIDYADSVEGR.F	Y	69.28	2662.23	4.5	666.568	4	163.31	Deamidation (NQ)
sp|Humira-HC|	K.NSLYLQ(+.98)M(+15.99)NSLR.A	Y	68.39	1354.66	-0.5	678.335	2	61.8	Deamidation (NQ); Oxidation (M)
sp|Humira-HC|	K.N(+.98)SLYLQM(+15.99)N(+.98)SLR.A	Y	68.14	1355.64	0.3	678.827	2	63.54	Deamidation (NQ); Oxidation (M)
sp|Humira-HC|	K.ALPAPIEK.T	N	68.12	837.496	-0.2	419.755	2	31.3
sp|Humira-HC|	K.ALPAPIEKTISK.A	N	67.69	1266.75	0.4	423.259	3	43.39
sp|Humira-HC|	K.NSLYLQM(+15.99)NSLRAEDTAVYYC(+57.02)AK.V	Y	66.07	2625.22	-1.3	876.08	3	77.78	Oxidation (M); Carbamidomethylation
sp|Humira-HC|	EVQLVESGGGLVQ(+.98)PGR.S	Y	65.6	1624.84	4.8	542.624	3	58.45	Deamidation (NQ)
sp|Humira-HC|	R.EEQYN(+1444.53)STYRVVSVLTVLHQDWLNGK.E	N	65.34	4422.03	0.3	1106.51	4	115.5	Fucosylated biantennary (-2 galactose)
sp|Humira-HC|	R.WQQGN(+.98)VFSC(+57.02)SVM(+15.99)HEALHNHYTQK.S	N	64.63	2817.24	3.2	940.09	3	67.97	Deamidation (NQ); Carbamidomethylation; Oxidation (M)
sp|Humira-HC|	R.DNAKN(+.98)SLYLQMNSLR.A	Y	63.8	1766.86	-0.8	589.961	3	63.3	Deamidation (NQ)
sp|Humira-HC|	K.DTLMISRTPEVTC(+57.02)VVVDVSHEDPEVKFNWYVDGVEVHNAKTKPR.E	N	63.71	5095.52	1.4	850.261	6	164.38	Carbamidomethylation
sp|Humira-HC|	K.NQ(+.98)VSLTC(+57.02)LVK.G	N	62.66	1161.61	-1.4	581.81	2	60.73	Deamidation (NQ); Carbamidomethylation
sp|Humira-HC|	K.NQVSLTC(+57.02)LVKGFYPSDIAVEWESNGQPENNYK.T	N	61.39	3685.74	1	1229.59	3	123.1	Carbamidomethylation
sp|Humira-HC|	K.N(+.98)QVSLTC(+57.02)LVK.G	N	61.28	1161.61	1	581.811	2	65.99	Deamidation (NQ); Carbamidomethylation
sp|Humira-HC|	K.AKGQPREPQVYTLPPSRDELTK.N	N	59.96	2509.33	0.9	628.34	4	43.3
sp|Humira-HC|	K.DTLMISR.T	N	58	834.427	1.1	418.221	2	28.59
sp|Humira-HC|	R.EEQYN(+1444.53)STYRVVSVLTVLHQDWLNGKEYK.C	N	57.58	4842.23	-3.5	969.449	5	110.34	Fucosylated biantennary (-2 galactose)
sp|Humira-HC|	R.EEQYN(+1444.53)STYRVVSVLTVLHQDWLN(+.98)GKEYK.C	N	57.14	4843.21	-0.7	969.649	5	109.99	Fucosylated biantennary (-2 galactose); Deamidation (NQ)
sp|Humira-HC|	K.DTLM(+15.99)ISR.T	N	56.73	850.422	0.8	426.219	2	24.51	Oxidation (M)
sp|Humira-HC|	R.DN(+.98)AKNSLYLQMNSLR.A	Y	55.52	1766.86	0.7	589.962	3	63.47	Deamidation (NQ)
sp|Humira-HC|	K.TTPPVLDSDGSFFLYSKLTVDK.S	N	55.44	2429.24	-1.3	810.752	3	105.91
sp|Humira-HC|	K.DTLMISRTPEVTC(+57.02)VVVDVSHEDPEVKFN(+.98)WYVDGVEVHNAK.T	N	55.05	4614.2	4.7	923.852	5	163.76	Carbamidomethylation; Deamidation (NQ)
sp|Humira-HC|	R.AEDTAVYYC(+57.02)AKVSYLSTASSLDYWGQGTLVTVSSASTK.G	Y	52.49	4078.94	-0.1	1020.74	4	154.58	Carbamidomethylation
sp|Humira-HC|	K.VSNKALPAPIEKTISK.A	N	52.4	1694.99	-0.5	424.755	4	38.41
sp|Humira-HC|	R.Q(+.98)APGKGLEWVSAITWNSGHIDYADSVEGR.F	Y	51.72	3143.49	3.7	1048.84	3	163.36	Deamidation (NQ)
sp|Humira-HC|	R.VVSVLTVLHQ(+.98)DWLNGK.E	N	50.83	1807.98	2.1	905.001	2	118.06	Deamidation (NQ)
sp|Humira-HC|	R.LSC(+57.02)AASGFTFDDYAMHWVRQAPGK.G	Y	50.71	2714.24	0.4	679.567	4	95.34	Carbamidomethylation
sp|Humira-HC|	R.EEQ(+.98)YN(+1444.53)STYRVVSVLTVLHQDWLN(+.98)GKEYK.C	N	50.47	4844.2	0.6	969.847	5	109.82	Deamidation (NQ); Fucosylated biantennary (-2 galactose)
sp|Humira-HC|	R.DELTKNQVSLTC(+57.02)LVKGFYPSDIAVEWESN(+.98)GQPENNYK.T	N	48.53	4273.02	-1.2	1069.26	4	123.13	Carbamidomethylation; Deamidation (NQ)
sp|Humira-HC|	K.GFYPSDIAVEWESN(+.98)GQ(+.98)PENNYK.T	N	46.82	2545.09	-2.3	849.369	3	102.78	Deamidation (NQ)
sp|Humira-HC|	R.DELTKNQ(+.98)VSLTC(+57.02)LVK.G	N	46.64	1747.9	-0.2	583.641	3	67.38	Deamidation (NQ); Carbamidomethylation
sp|Humira-HC|	K.TKPREEQYN(+1444.53)STYRVVSVLTVLHQDWLNGKEYK.C	N	45.76	5324.52	-2.1	888.426	6	103.48	Fucosylated biantennary (-2 galactose)
sp|Humira-HC|	K.DYFPEPVTVSWNSGALTSGVHTFPAVLQSSGLYSLSSVVTVPSSSLGTQ(+.98)TYIC(+57.02)NVNHKPSNTK.V	N	45.19	6713.29	2.4	1343.67	5	145.39	Deamidation (NQ); Carbamidomethylation
sp|Humira-HC|	K.ALPAPIEKTISKAK.G	N	44.38	1465.89	0.7	489.637	3	43.85
sp|Humira-HC|	K.DYFPEPVTVSWNSGALTSGVHTFPAVLQ(+.98)SSGLYSLSSVVTVPSSSLGTQTYIC(+57.02)NVNHKPSN(+.98)TK.V	N	42.44	6714.27	2.5	960.192	7	141.78	Deamidation (NQ); Carbamidomethylation
sp|Humira-HC|	R.SLRLSC(+57.02)AASGFTFDDYAM(+15.99)HWVR.Q	Y	42.29	2605.18	0.7	652.304	4	99.48	Carbamidomethylation; Oxidation (M)
sp|Humira-HC|	K.TKPREEQ(+.98)YN(+1606.59)STYRVVSVLTVLHQDWLNGKEYK.C	N	41.51	5487.56	2.8	915.604	6	103.19	Deamidation (NQ); Fucosylated biantennary (-1 galactose)
sp|Humira-HC|	R.WQQGNVFSC(+57.02)SVM(+15.99)HEALHNHYTQ(+.98)K.S	N	40.79	2817.24	2.6	705.319	4	54.68	Carbamidomethylation; Oxidation (M); Deamidation (NQ)
sp|Humira-HC|	K.GQPREPQ(+.98)VYTLPPSRDELTK.N	N	39.56	2311.18	5	578.805	4	52.83	Deamidation (NQ)
sp|Humira-HC|	R.EPQVYTLPPSRDELTKN(+.98)QVSLTC(+57.02)LVKGFYPSDIAVEWESNGQPENNYK.T	N	39.01	5540.67	2.2	1109.14	5	123.19	Deamidation (NQ); Carbamidomethylation
sp|Humira-HC|	K.TTPPVLDSDGSFFLYSKLTVDKSRWQ(+.98)QGNVFSC(+57.02)SVMHEALHNHYTQK.S	N	38.8	5455.6	0.2	910.275	6	164.35	Deamidation (NQ); Carbamidomethylation
sp|Humira-LC|	K.VYAC(+57.02)EVTHQGLSSPVTK.S	N	156.21	1874.92	-0.6	938.467	2	38.66	Carbamidomethylation
sp|Humira-LC|	K.HKVYAC(+57.02)EVTHQGLSSPVTK.S	N	139.81	2140.07	2.3	536.027	4	27.74	Carbamidomethylation
sp|Humira-LC|	K.VDN(+.98)ALQSGNSQESVTEQDSK.D	N	136.86	2135.95	-0.3	1068.98	2	20	Deamidation (NQ)
sp|Humira-LC|	K.VDNALQSGN(+.98)SQESVTEQDSK.D	N	132.05	2135.95	1.6	1068.98	2	22.22	Deamidation (NQ)
sp|Humira-LC|	K.VDNALQSGNSQESVTEQDSK.D	N	131.59	2134.96	0.7	1068.49	2	20.18
sp|Humira-LC|	K.VDNALQSGNSQ(+.98)ESVTEQDSK.D	N	127.9	2135.95	0.4	1068.98	2	23.29	Deamidation (NQ)
sp|Humira-LC|	DIQM(+15.99)TQSPSSLSASVGDR.V	N	125.95	1893.87	0	947.944	2	48.84	Oxidation (M)
sp|Humira-LC|	K.VDNALQSGNSQESVTEQDSKDSTYSLSSTLTLSKADYEKHK.V	N	123.19	4490.12	-0.2	899.031	5	63.86
sp|Humira-LC|	R.YNRAPYTFGQGTKVEIKR.T	Y	119.77	2127.12	0.1	532.788	4	40.45
sp|Humira-LC|	K.RTVAAPSVFIFPPSDEQLKSGTASVVC(+57.02)LLNNFYPR.E	N	119.54	3880	-2.3	971.005	4	143.19	Carbamidomethylation
sp|Humira-LC|	K.VQWKVDNALQSGNSQESVTEQDSK.D	N	117.59	2676.26	-0.1	893.095	3	49.74
sp|Humira-LC|	R.NYLAWYQQKPGKAPKLLIYAASTLQSGVPSR.F	Y	117.4	3447.87	-1.1	862.973	4	105.9
sp|Humira-LC|	K.SGTASVVC(+57.02)LLNNFYPR.E	N	115.99	1796.89	-0.3	899.451	2	115.1	Carbamidomethylation
sp|Humira-LC|	R.TVAAPSVFIFPPSDEQLK.S	N	115.62	1945.02	-1.4	973.516	2	103.39
sp|Humira-LC|	R.TVAAPSVFIFPPSDEQLKSGTASVVC(+57.02)LLNNFYPREAK.V	N	115.09	4052.07	0.2	1014.03	4	143.35	Carbamidomethylation
sp|Humira-LC|	R.TVAAPSVFIFPPSDEQLKSGTASVVC(+57.02)LLNNFYPR.E	N	114.96	3723.9	1	931.982	4	146.15	Carbamidomethylation
sp|Humira-LC|	K.VYAC(+57.02)EVTHQ(+.98)GLSSPVTK.S	N	114.8	1875.9	1.2	938.96	2	41.19	Carbamidomethylation; Deamidation (NQ)
sp|Humira-LC|	R.FSGSGSGTDFTLTISSLQPEDVATYYC(+57.02)QR.Y	Y	113.93	3186.45	-0.8	1594.23	2	111.97	Carbamidomethylation
sp|Humira-LC|	R.ASQGIRNYLAWYQQKPGKAPKLLIYAASTLQSGVPSR.F	Y	111.31	4060.2	-0.4	1016.06	4	107.17
sp|Humira-LC|	DIQMTQSPSSLSASVGDR.V	N	110.4	1877.88	0.2	939.947	2	55.79
sp|Humira-LC|	K.RTVAAPSVFIFPPSDEQLK.S	N	109.05	2101.12	1.1	701.382	3	91.31
sp|Humira-LC|	K.SGTASVVC(+57.02)LLN(+.98)NFYPR.E	N	108.81	1797.87	0.4	899.944	2	119.83	Carbamidomethylation; Deamidation (NQ)
sp|Humira-LC|	K.VDNALQ(+.98)SGNSQESVTEQDSK.D	N	108.73	2135.95	2.2	1068.98	2	22.58	Deamidation (NQ)
sp|Humira-LC|	DIQMTQSPSSLSASVGDRVTITC(+57.02)R.A	N	107.91	2608.26	-0.8	870.426	3	70.45	Carbamidomethylation
sp|Humira-LC|	K.DSTYSLSSTLTLSK.A	N	107.44	1501.75	0.1	751.883	2	72.03
sp|Humira-LC|	K.VDNALQSGNSQESVTEQDSKDSTYSLSSTLTLSKADYEK.H	N	105.32	4224.97	-0.9	1057.25	4	72.25
sp|Humira-LC|	K.APKLLIYAASTLQSGVPSR.F	Y	102.74	1971.12	0.5	658.046	3	92.02
sp|Humira-LC|	K.SGTASVVC(+57.02)LLNN(+.98)FYPR.E	N	101.31	1797.87	-2.2	899.941	2	103.8	Carbamidomethylation; Deamidation (NQ)
sp|Humira-LC|	K.VDNALQ(+.98)SGN(+.98)SQESVTEQDSK.D	N	100.91	2136.93	2.9	1069.48	2	22.77	Deamidation (NQ)
sp|Humira-LC|	R.N(+.98)YLAWYQQKPGK.A	Y	99.34	1495.75	-0.6	748.88	2	64.82	Deamidation (NQ)
sp|Humira-LC|	K.VDNALQSGNSQESVTEQDSKDSTYSLSSTLTLSK.A	N	98.78	3618.7	0.7	1207.24	3	71.41
sp|Humira-LC|	R.YNRAPYTFGQGTK.V	Y	95.86	1501.73	0.1	501.584	3	29.63
sp|Humira-LC|	K.LLIYAASTLQSGVPSR.F	Y	95.67	1674.93	-1	838.472	2	155.32
sp|Humira-LC|	R.NYLAWYQQKPGK.A	Y	93.58	1494.76	-0.7	748.388	2	117.95
sp|Humira-LC|	K.SGTASVVC(+57.02)LLN(+.98)N(+.98)FYPR.E	N	93.2	1798.86	-0.1	900.435	2	95.89	Carbamidomethylation; Deamidation (NQ)
sp|Humira-LC|	R.FSGSGSGTDFTLTISSLQ(+.98)PEDVATYYC(+57.02)QR.Y	Y	88.33	3187.43	4.1	1063.49	3	114.59	Deamidation (NQ); Carbamidomethylation
sp|Humira-LC|	R.APYTFGQGTKVEIKR.T	Y	85.8	1693.91	0.7	424.486	4	40.11
sp|Humira-LC|	R.APYTFGQGTK.V	Y	85.26	1068.52	0.5	535.269	2	26.77
sp|Humira-LC|	DIQM(+15.99)TQSPSSLSASVGDRVTITC(+57.02)R.A	N	84.34	2624.25	-1.4	875.757	3	65.77	Oxidation (M); Carbamidomethylation
sp|Humira-LC|	DIQMTQ(+.98)SPSSLSASVGDR.V	N	83.92	1878.86	4.5	940.443	2	58.57	Deamidation (NQ)
sp|Humira-LC|	R.YNRAPYTFGQGTKVEIK.R	Y	81.92	1971.02	-0.8	493.762	4	47.39
sp|Humira-LC|	R.NYLAWYQQKPGKAPK.L	Y	80.65	1790.95	-0.2	448.744	4	46.5
sp|Humira-LC|	R.APYTFGQ(+.98)GTK.V	Y	77.28	1069.51	0.5	535.761	2	28.54	Deamidation (NQ)
sp|Humira-LC|	R.APYTFGQGTKVEIKRTVAAPSVFIFPPSDEQLK.S	Y	73.1	3620.92	0.7	725.193	5	96.85
sp|Humira-LC|	R.NYLAWYQQ(+.98)KPGK.A	Y	73.03	1495.75	3.6	748.883	2	54.73	Deamidation (NQ)
sp|Humira-LC|	R.ASQGIRNYLAWYQQKPGKAPK.L	Y	72.12	2403.28	-0.7	601.827	4	60.52
sp|Humira-LC|	R.APYTFGQGTKVEIK.R	Y	71.63	1537.81	0.5	513.612	3	48.73
sp|Humira-LC|	R.NYLAWYQ(+.98)QKPGK.A	Y	66.13	1495.75	1.8	748.882	2	55.49	Deamidation (NQ)
sp|Humira-LC|	DIQ(+.98)M(+15.99)TQSPSSLSASVGDR.V	N	65.44	1894.86	3.5	948.439	2	41.88	Deamidation (NQ); Oxidation (M)
sp|Humira-LC|	DIQM(+15.99)TQ(+.98)SPSSLSASVGDR.V	N	57.03	1894.86	1.7	948.438	2	41.33	Oxidation (M); Deamidation (NQ)
sp|Humira-LC|	R.NYLAWYQ(+.98)QKPGKAPKLLIYAASTLQSGVPSR.F	Y	54.1	3448.85	4	1150.63	3	106.04	Deamidation (NQ)
sp|Humira-LC|	DIQMTQSPSSLSASVGDRVTITC(+57.02)RASQGIR.N	Y	51.99	3220.59	0.3	806.156	4	72.32	Carbamidomethylation
sp|Humira-LC|	K.VDNALQ(+.98)SGNSQESVTEQDSKDSTYSLSSTLTLSK.A	N	50.96	3619.69	4.6	905.933	4	72.61	Deamidation (NQ)
sp|Humira-LC|	K.VYAC(+57.02)EVTHQGLSSPVTKSFNR.G	N	49.62	2379.16	0.6	595.799	4	49.65	Carbamidomethylation
sp|Humira-LC|	R.ASQGIRNYLAWYQQKPGK.A	Y	47.67	2107.1	1.5	527.782	4	65.28
sp|Humira-LC|	K.VQWKVDNALQSGNSQESVTEQDSKDSTYSLSSTLTLSK.A	N	47.1	4160	1.8	1041.01	4	82.71
sp|Humira-LC|	R.FSGSGSGTDFTLTISSLQPEDVATYYC(+57.02)QRYNRAPYTFGQGTK.V	Y	40.05	4670.17	0.3	1168.55	4	113.99	Carbamidomethylation
sp|Humira-LC|	K.RTVAAPSVFIFPPSDEQ(+.98)LKSGTASVVC(+57.02)LLNNFYPR.E	N	39.38	3880.98	3	971.256	4	143.96	Deamidation (NQ); Carbamidomethylation
sp|Humira-LC|	DIQM(+15.99)TQ(+.98)SPSSLSASVGDRVTITC(+57.02)R.A	N	39.17	2625.24	4.4	876.09	3	69.73	Oxidation (M); Deamidation (NQ); Carbamidomethylation
sp|Humira-LC|	R.TVAAPSVFIFPPSDEQLKSGTASVVC(+57.02)LLNNFYPREAKVQWK.V	N	38.74	4593.37	-0.5	919.681	5	143.58	Carbamidomethylation

## Sheet: Rep_3
Table S3. Lists of peptides issued from the constrained tryptic workflow.
Protein Accession	Peptide	Unique	-10lgP	Mass	ppm	m/z	z	RT
sp|Humira-HC|	K.SC(+57.02)DKTHTC(+57.02)PPC(+57.02)PAPELLGGPSVFLFPPKPK.D	N	200	3333.63	1.6	667.735	5	98.82
sp|Humira-HC|	K.THTC(+57.02)PPC(+57.02)PAPELLGGPSVFLFPPKPK.D	N	200	2843.45	-0.2	948.824	3	103.14
sp|Humira-HC|	K.SC(+57.02)DKTHTC(+57.02)PPC(+57.02)PAPELLGGPSVFLFPPKPKDTLM(+15.99)ISR.T	N	200	4166.05	0.2	834.217	5	102.78
sp|Humira-HC|	K.SC(+57.02)DKTHTC(+57.02)PPC(+57.02)PAPELLGGPSVFLFPPKPKDTLMISR.T	N	200	4150.05	1.5	831.019	5	105.89
sp|Humira-HC|	K.DYFPEPVTVSWNSGALTSGVHTFPAVLQSSGLYSLSSVVTVPSSSLGTQTYIC(+57.02)NVNHKPSNTK.V	N	164.02	6712.31	0.3	1343.47	5	140.39
sp|Humira-HC|	K.THTC(+57.02)PPC(+57.02)PAPELLGGPSVFLFPPKPKDTLMISR.T	N	163.87	3659.87	-1.1	732.98	5	110.23
sp|Humira-HC|	K.GLEWVSAITWNSGHIDYADSVEGR.F	Y	153.94	2661.25	0.2	888.089	3	111.91
sp|Humira-HC|	K.GFYPSDIAVEWESN(+.98)GQPENNYK.T	N	149.76	2544.11	0.2	1273.06	2	92.52
sp|Humira-HC|	K.VSYLSTASSLDYWGQGTLVTVSSASTKGPSVFPLAPSSK.S	Y	146.09	3975.02	2.4	994.763	4	126.09
sp|Humira-HC|	K.GFYPSDIAVEWESNGQPENNYK.T	N	145.69	2543.12	0.6	1272.57	2	92.94
sp|Humira-HC|	K.GQPREPQVYTLPPSRDELTKNQVSLTC(+57.02)LVK.G	N	144.57	3452.81	0.3	864.21	4	80.32
sp|Humira-HC|	R.QAPGKGLEWVSAITWNSGHIDYADSVEGR.F	Y	142.84	3142.51	1.1	786.636	4	103.19
sp|Humira-HC|	R.LSC(+57.02)AASGFTFDDYAMHWVR.Q	Y	142.29	2232.97	0.6	1117.49	2	102.52
sp|Humira-HC|	R.WQQGNVFSC(+57.02)SVMHEALHNHYTQK.S	N	135.35	2800.26	-2.1	1401.13	2	69.08
sp|Humira-HC|	R.WQQGNVFSC(+57.02)SVM(+15.99)HEALHNHYTQK.S	N	131.37	2816.25	1.2	705.072	4	62.76
sp|Humira-HC|	R.SLRLSC(+57.02)AASGFTFDDYAMHWVR.Q	Y	131.28	2589.19	-0.3	648.304	4	105
sp|Humira-HC|	R.LSC(+57.02)AASGFTFDDYAM(+15.99)HWVR.Q	Y	128.76	2248.97	-0.4	1125.49	2	95.75
sp|Humira-HC|	K.DYFPEPVTVSWNSGALTSGVHTFPAVLQSSGLYSLSSVVTVPSSSLGTQTYIC(+57.02)NVN(+.98)HKPSNTK.V	N	127.87	6713.29	0.3	1119.89	6	141.32
sp|Humira-HC|	R.WQQGN(+.98)VFSC(+57.02)SVMHEALHNHYTQK.S	N	127.56	2801.24	1.6	701.319	4	73
sp|Humira-HC|	R.WQQGNVFSC(+57.02)SVMHEALHN(+.98)HYTQK.S	N	126.42	2801.24	3.6	561.258	5	70.24
sp|Humira-HC|	K.GFYPSDIAVEWESNGQPEN(+.98)NYK.T	N	126.12	2544.11	1	1273.06	2	94.36
sp|Humira-HC|	K.THTC(+57.02)PPC(+57.02)PAPELLGGPSVFLFPPKPKDTLM(+15.99)ISR.T	N	125.48	3675.86	1.6	919.974	4	106.81
sp|Humira-HC|	R.TPEVTC(+57.02)VVVDVSHEDPEVK.F	N	118	2138.02	1.4	713.682	3	73.56
sp|Humira-HC|	K.TTPPVLDSDGSFFLYSKLTVDKSRWQQGNVFSC(+57.02)SVMHEALHNHYTQK.S	N	115.64	5454.62	-0.8	910.11	6	164.53
sp|Humira-HC|	K.VSYLSTASSLDYWGQGTLVTVSSASTK.G	Y	112.61	2807.39	0.8	1404.7	2	109.88
sp|Humira-HC|	K.TTPPVLDSDGSFFLYSK.L	N	109.35	1872.91	1	625.313	3	96.6
sp|Humira-HC|	R.EPQVYTLPPSRDELTKNQVSLTC(+57.02)LVKGFYPSDIAVEWESNGQPENNYK.T	N	109.26	5539.69	3.9	1108.95	5	124.75
sp|Humira-HC|	R.TPEVTC(+57.02)VVVDVSHEDPEVKFNWYVDGVEVHNAK.T	N	107.33	3796.8	0.3	950.209	4	163.77
sp|Humira-HC|	K.GLEWVSAITWN(+.98)SGHIDYADSVEGR.F	Y	106.6	2662.23	2.7	888.42	3	139.65
sp|Humira-HC|	EVQLVESGGGLVQPGR.S	Y	106.09	1623.86	1	812.937	2	56.15
sp|Humira-HC|	K.GFYPSDIAVEWESN(+.98)GQPEN(+.98)NYK.T	N	105.92	2545.09	-0.3	1273.55	2	96.32
sp|Humira-HC|	R.VVSVLTVLHQDWLN(+.98)GKEYK.C	N	105.12	2228.18	0	743.735	3	105.11
sp|Humira-HC|	K.NSLYLQMNSLRAEDTAVYYC(+57.02)AK.V	Y	104.91	2609.23	1.7	870.75	3	85.05
sp|Humira-HC|	R.EPQVYTLPPSRDELTK.N	N	104.76	1871.96	-0.4	936.988	2	55.6
sp|Humira-HC|	R.VVSVLTVLHQDWLN(+.98)GK.E	N	104.46	1807.98	1.1	905	2	110.5
sp|Humira-HC|	K.DYFPEPVTVSWN(+.98)SGALTSGVHTFPAVLQ(+.98)SSGLYSLSSVVTVPSSSLGTQTYIC(+57.02)NVNHKPSNTK.V	N	102.8	6714.27	4	1120.06	6	140.63
sp|Humira-HC|	K.DYFPEPVTVSWNSGALTSGVHTFPAVLQ(+.98)SSGLYSLSSVVTVPSSSLGTQTYIC(+57.02)NVNHKPSNTK.V	N	102.62	6713.29	4.9	1343.67	5	142.16
sp|Humira-HC|	R.EPQVYTLPPSRDELTKNQVSLTC(+57.02)LVK.G	N	101.7	3014.57	2	754.653	4	84.59
sp|Humira-HC|	K.GPSVFPLAPSSKSTSGGTAALGC(+57.02)LVK.D	N	99.97	2488.3	4.4	830.444	3	88.86
sp|Humira-HC|	K.DYFPEPVTVSWN(+.98)SGALTSGVHTFPAVLQSSGLYSLSSVVTVPSSSLGTQTYIC(+57.02)NVNHKPSNTK.V	N	99.82	6713.29	3.8	1343.67	5	141.47
sp|Humira-HC|	K.TTPPVLDSDGSFFLYSKLTVDKSR.W	N	99.7	2672.37	0.4	669.1	4	97.75
sp|Humira-HC|	R.VVSVLTVLHQDWLNGKEYK.C	N	96.02	2227.2	0.6	743.408	3	103.59
sp|Humira-HC|	K.N(+.98)SLYLQMNSLR.A	Y	95.7	1338.66	0.6	670.338	2	75.3
sp|Humira-HC|	K.GPSVFPLAPSSK.S	N	95.33	1185.64	1.4	593.828	2	60.21
sp|Humira-HC|	K.NSLYLQMNSLR.A	Y	93.4	1337.68	0.8	669.846	2	67.83
sp|Humira-HC|	K.DTLMISRTPEVTC(+57.02)VVVDVSHEDPEVKFNWYVDGVEVHNAK.T	N	92.88	4613.22	0.4	923.652	5	163.71
sp|Humira-HC|	R.DELTKNQVSLTC(+57.02)LVK.G	N	90.56	1746.92	1.7	583.314	3	66.4
sp|Humira-HC|	K.STSGGTAALGC(+57.02)LVK.D	N	90.52	1320.67	0	661.343	2	48.91
sp|Humira-HC|	R.WQQGNVFSC(+57.02)SVMHEALHNHYTQ(+.98)K.S	N	89.13	2801.24	1.1	934.756	3	71.29
sp|Humira-HC|	R.WQQGNVFSC(+57.02)SVM(+15.99)HEALHN(+.98)HYTQK.S	N	88.33	2817.24	1.4	705.318	4	54.23
sp|Humira-HC|	EVQ(+.98)LVESGGGLVQPGR.S	Y	87.29	1624.84	3.4	542.623	3	58.57
sp|Humira-HC|	K.GQPREPQVYTLPPSRDELTK.N	N	87.02	2310.2	0.5	578.557	4	50.01
sp|Humira-HC|	K.NSLYLQMN(+.98)SLR.A	Y	85.84	1338.66	0.3	670.338	2	71.42
sp|Humira-HC|	K.FNWYVDGVEVHN(+.98)AK.T	N	85.42	1677.78	-0.4	839.896	2	73.16
sp|Humira-HC|	K.VSNKALPAPIEK.T	N	85.36	1265.73	0.8	633.875	2	25.13
sp|Humira-HC|	R.AEDTAVYYC(+57.02)AK.V	Y	85.01	1289.56	0.2	645.787	2	26.91
sp|Humira-HC|	K.NSLYLQM(+15.99)NSLR.A	Y	84.82	1353.67	0.4	677.843	2	56.21
sp|Humira-HC|	R.VVSVLTVLHQDWLN(+.98)GKEYKC(+57.02)K.V	N	82.28	2516.31	0.2	630.085	4	97.86
sp|Humira-HC|	R.EPQVYTLPPSR.D	N	82.05	1285.67	-0.3	643.84	2	43.76
sp|Humira-HC|	K.N(+.98)SLYLQM(+15.99)NSLR.A	Y	81.27	1354.66	1.7	678.336	2	65.5
sp|Humira-HC|	K.FNWYVDGVEVHNAK.T	N	80.72	1676.79	0	839.405	2	67.07
sp|Humira-HC|	EVQLVESGGGLVQPGRSLR.L	Y	80.17	1980.08	0.3	661.033	3	61.16
sp|Humira-HC|	R.SLRLSC(+57.02)AASGFTFDDYAM(+15.99)HWVR.Q	Y	79.57	2605.18	0.2	652.303	4	98.86
sp|Humira-HC|	R.WQQGN(+.98)VFSC(+57.02)SVM(+15.99)HEALHNHYTQK.S	N	79.47	2817.24	2.7	705.319	4	70.08
sp|Humira-HC|	K.DYFPEPVTVSWNSGALTSGVHTFPAVLQSSGLYSLSSVVTVPSSSLGTQTYIC(+57.02)N(+.98)VNHKPSNTK.V	N	78.77	6713.29	-2.3	840.167	8	141.3
sp|Humira-HC|	R.VVSVLTVLHQDWLNGK.E	N	78.34	1807	1.4	603.341	3	110.41
sp|Humira-HC|	K.NSLYLQM(+15.99)N(+.98)SLR.A	Y	78.18	1354.66	0.8	678.335	2	54.11
sp|Humira-HC|	K.GFYPSDIAVEWESNGQPENNYKTTPPVLDSDGSFFLYSK.L	N	77.38	4398.03	1.9	1100.52	4	125.44
sp|Humira-HC|	K.NSLYLQ(+.98)MNSLR.A	Y	77.33	1338.66	2.4	670.339	2	73.18
sp|Humira-HC|	R.DELTKN(+.98)QVSLTC(+57.02)LVK.G	N	76.18	1747.9	0.9	583.642	3	67.69
sp|Humira-HC|	EVQLVESGGGLVQ(+.98)PGR.S	Y	76.1	1624.84	4.4	542.624	3	58.4
sp|Humira-HC|	K.NQVSLTC(+57.02)LVK.G	N	75.05	1160.62	2.2	581.32	2	59.1
sp|Humira-HC|	K.N(+.98)SLYLQMN(+.98)SLR.A	Y	74.67	1339.64	4.5	670.832	2	71.95
sp|Humira-HC|	K.VSNKALPAPIEKTISK.A	N	73.95	1694.99	-1.2	424.755	4	38.59
sp|Humira-HC|	K.NSLYLQ(+.98)M(+15.99)NSLR.A	Y	73.94	1354.66	0.8	678.335	2	62.18
sp|Humira-HC|	K.ALPAPIEKTISK.A	N	73.33	1266.75	0.9	634.385	2	43.86
sp|Humira-HC|	K.FN(+.98)WYVDGVEVHNAK.T	N	72.94	1677.78	4.6	839.9	2	66.89
sp|Humira-HC|	K.VSYLSTASSLDYWGQ(+.98)GTLVTVSSASTK.G	Y	72.86	2808.37	2.5	1405.2	2	111.01
sp|Humira-HC|	K.NQVSLTC(+57.02)LVKGFYPSDIAVEWESNGQPENNYK.T	N	72.83	3685.74	2.4	1229.59	3	123.15
sp|Humira-HC|	K.N(+.98)SLYLQM(+15.99)N(+.98)SLR.A	Y	70.33	1355.64	1.1	678.828	2	63.76
sp|Humira-HC|	K.AKGQPREPQVYTLPPSRDELTK.N	N	70.16	2509.33	0.5	628.34	4	42.84
sp|Humira-HC|	K.GFYPSDIAVEWESNGQ(+.98)PENNYK.T	N	69.9	2544.11	0.6	849.044	3	101.19
sp|Humira-HC|	K.ALPAPIEK.T	N	68.04	837.496	1.4	419.756	2	32.6
sp|Humira-HC|	K.N(+.98)SLYLQ(+.98)M(+15.99)NSLR.A	Y	67.42	1355.64	0.4	678.827	2	63.58
sp|Humira-HC|	R.VVSVLTVLHQDWLNGKEYKC(+57.02)K.V	N	67.26	2515.33	-0.5	504.072	5	96.1
sp|Humira-HC|	K.NQ(+.98)VSLTC(+57.02)LVK.G	N	66.1	1161.61	0.2	581.811	2	60.65
sp|Humira-HC|	EVQLVESGGGLVQPGRSLRLSC(+57.02)AASGFTFDDYAMHWVR.Q	Y	64	4195.04	-2.1	840.013	5	114.58
sp|Humira-HC|	K.GFYPSDIAVEWESN(+.98)GQ(+.98)PENNYK.T	N	62.91	2545.09	3.2	1273.56	2	96.67
sp|Humira-HC|	K.N(+.98)QVSLTC(+57.02)LVK.G	N	62.27	1161.61	1.3	581.811	2	65.96
sp|Humira-HC|	K.NSLYLQM(+15.99)NSLRAEDTAVYYC(+57.02)AK.V	Y	62.23	2625.22	1.1	876.082	3	77.26
sp|Humira-HC|	R.EEQYN(+1444.53)STYRVVSVLTVLHQDWLNGK.E	N	61.67	4422.03	2.6	1106.52	4	115.55
sp|Humira-HC|	R.DNAKN(+.98)SLYLQMNSLR.A	Y	61.4	1766.86	0.7	589.962	3	63.51
sp|Humira-HC|	K.VSN(+.98)KALPAPIEK.T	N	59.32	1266.72	-0.8	423.246	3	28.97
sp|Humira-HC|	K.DTLMISR.T	N	59.01	834.427	3	418.222	2	28.37
sp|Humira-HC|	R.TPEVTC(+57.02)VVVDVSHEDPEVKFN(+.98)WYVDGVEVHNAK.T	N	58.98	3797.79	3.6	950.458	4	155.02
sp|Humira-HC|	R.DNAKNSLYLQMNSLRAEDTAVYYC(+57.02)AK.V	Y	58.96	3037.43	0	760.364	4	82.92
sp|Humira-HC|	R.AEDTAVYYC(+57.02)AKVSYLSTASSLDYWGQGTLVTVSSASTK.G	Y	57.21	4078.94	1.1	1020.74	4	163.25
sp|Humira-HC|	K.TKPREEQYN(+1444.53)STYRVVSVLTVLHQDWLNGKEYK.C	N	57.16	5324.52	-0.7	888.427	6	103.76
sp|Humira-HC|	K.DTLM(+15.99)ISR.T	N	57.01	850.422	0.9	426.219	2	26.35
sp|Humira-HC|	EVQLVESGGGLVQ(+.98)PGRSLRLSC(+57.02)AASGFTFDDYAM(+15.99)HWVR.Q	Y	55.69	4212.02	4.9	843.414	5	110.08
sp|Humira-HC|	K.ALPAPIEKTISKAK.G	N	55.22	1465.89	0.2	489.636	3	43.83
sp|Humira-HC|	EVQLVESGGGLVQPGRSLRLSC(+57.02)AASGFTFDDYAM(+15.99)HWVR.Q	Y	54.92	4211.03	0.4	843.214	5	110.07
sp|Humira-HC|	R.TPEVTC(+57.02)VVVDVSHEDPEVKFNWYVDGVEVHNAKTKPR.E	N	52.56	4279.1	1.1	714.192	6	164.47
sp|Humira-HC|	K.TTPPVLDSDGSFFLYSKLTVDK.S	N	52.52	2429.24	2.3	810.755	3	105.92
sp|Humira-HC|	R.DELTKNQVSLTC(+57.02)LVKGFYPSDIAVEWESNGQPENNYK.T	N	51.53	4272.03	-1.3	1069.01	4	123.63
sp|Humira-HC|	R.EEQ(+.98)YN(+1444.53)STYRVVSVLTVLHQDWLN(+.98)GKEYK.C	N	47.88	4844.2	3.6	969.85	5	110.04
sp|Humira-HC|	K.DTLMISRTPEVTC(+57.02)VVVDVSHEDPEVK.F	N	47.34	2954.44	2	739.618	4	90.26
sp|Humira-HC|	R.EEQYN(+1444.53)STYRVVSVLTVLHQDWLNGKEYK.C	N	45.5	4842.23	0.4	969.453	5	110.56
sp|Humira-HC|	R.LSC(+57.02)AASGFTFDDYAMHWVRQAPGKGLEWVSAITWNSGHIDYADSVEGR.F	Y	45.14	5357.47	1.1	893.92	6	137.86
sp|Humira-HC|	K.TKPREEQYN(+1444.53)STYRVVSVLTVLHQ(+.98)DWLNGKEYK.C	N	43.67	5325.51	0.3	761.794	7	103.61
sp|Humira-HC|	K.TKPREEQYN(+1606.59)STYRVVSVLTVLHQDWLNGKEYK.C	N	42.6	5486.58	-0.1	915.437	6	103.03
sp|Humira-HC|	K.DTLM(+15.99)ISRTPEVTC(+57.02)VVVDVSHEDPEVK.F	N	42.39	2970.43	3.3	743.618	4	86.55
sp|Humira-HC|	K.TKPREEQ(+.98)YN(+1444.53)STYRVVSVLTVLHQDWLN(+.98)GKEYK.C	N	42.24	5326.49	3.5	888.759	6	102.06
sp|Humira-HC|	K.C(+57.02)KVSNKALPAPIEK.T	N	39.26	1553.86	1.1	518.961	3	22.95
sp|Humira-LC|	K.VYAC(+57.02)EVTHQGLSSPVTK.S	N	163.94	1874.92	1	938.468	2	38.34
sp|Humira-LC|	K.HKVYAC(+57.02)EVTHQGLSSPVTK.S	N	147.63	2140.07	1	714.366	3	27.71
sp|Humira-LC|	K.VQWKVDNALQSGNSQESVTEQDSK.D	N	142.13	2676.26	0.2	893.095	3	49.99
sp|Humira-LC|	K.VDNALQSGNSQESVTEQDSK.D	N	138.82	2134.96	0.5	1068.49	2	20.15
sp|Humira-LC|	K.VDNALQSGN(+.98)SQESVTEQDSK.D	N	135.49	2135.95	3.1	1068.98	2	20.83
sp|Humira-LC|	K.VDNALQSGNSQ(+.98)ESVTEQDSK.D	N	133.11	2135.95	1.8	1068.98	2	23.36
sp|Humira-LC|	DIQM(+15.99)TQSPSSLSASVGDR.V	N	126.22	1893.87	0	947.944	2	49.33
sp|Humira-LC|	K.VDN(+.98)ALQSGNSQESVTEQDSK.D	N	126.18	2135.95	-0.1	1068.98	2	20.03
sp|Humira-LC|	R.YNRAPYTFGQGTKVEIKR.T	Y	125.93	2127.12	0.3	532.788	4	40.75
sp|Humira-LC|	K.VDNALQSGNSQESVTEQDSKDSTYSLSSTLTLSKADYEK.H	N	123.78	4224.97	0.5	1057.25	4	72.35
sp|Humira-LC|	R.TVAAPSVFIFPPSDEQLKSGTASVVC(+57.02)LLNNFYPR.E	N	123.45	3723.9	2.2	1242.31	3	145.94
sp|Humira-LC|	R.TVAAPSVFIFPPSDEQLKSGTASVVC(+57.02)LLNNFYPREAK.V	N	122.72	4052.07	2	1014.03	4	143.68
sp|Humira-LC|	DIQMTQSPSSLSASVGDR.V	N	121.69	1877.88	1.4	939.948	2	54.31
sp|Humira-LC|	R.TVAAPSVFIFPPSDEQLK.S	N	121.63	1945.02	0.7	973.518	2	100.17
sp|Humira-LC|	K.VDNALQ(+.98)SGNSQESVTEQDSK.D	N	120.83	2135.95	1	1068.98	2	22.32
sp|Humira-LC|	K.SGTASVVC(+57.02)LLNNFYPR.E	N	119.56	1796.89	0.4	899.452	2	114.64
sp|Humira-LC|	K.VYAC(+57.02)EVTHQ(+.98)GLSSPVTK.S	N	115.28	1875.9	0.2	938.959	2	41.31
sp|Humira-LC|	R.ASQGIRNYLAWYQQKPGKAPKLLIYAASTLQSGVPSR.F	Y	114.41	4060.2	0.9	813.048	5	107.47
sp|Humira-LC|	K.SGTASVVC(+57.02)LLN(+.98)NFYPR.E	N	114.01	1797.87	0.3	899.943	2	93.42
sp|Humira-LC|	K.VDNALQSGNSQESVTEQDSKDSTYSLSSTLTLSK.A	N	113.55	3618.7	0.6	1207.24	3	71.4
sp|Humira-LC|	K.SGTASVVC(+57.02)LLNN(+.98)FYPR.E	N	109.64	1797.87	-1.5	899.942	2	103.8
sp|Humira-LC|	K.RTVAAPSVFIFPPSDEQLK.S	N	109.57	2101.12	-0.3	701.381	3	92.93
sp|Humira-LC|	R.FSGSGSGTDFTLTISSLQPEDVATYYC(+57.02)QR.Y	Y	108.98	3186.45	1.5	1063.16	3	111.29
sp|Humira-LC|	K.DSTYSLSSTLTLSK.A	N	107.13	1501.75	0.5	751.883	2	117.72
sp|Humira-LC|	DIQMTQSPSSLSASVGDRVTITC(+57.02)R.A	N	106.49	2608.26	0.3	870.427	3	163.29
sp|Humira-LC|	R.NYLAWYQQKPGKAPKLLIYAASTLQSGVPSR.F	Y	105.29	3447.87	-0.6	862.973	4	105.96
sp|Humira-LC|	K.RTVAAPSVFIFPPSDEQLKSGTASVVC(+57.02)LLNNFYPR.E	N	103.7	3880	0.2	971.007	4	143.33
sp|Humira-LC|	K.APKLLIYAASTLQSGVPSR.F	Y	100.3	1971.12	1.4	658.047	3	92.07
sp|Humira-LC|	K.VDNALQSGNSQESVTEQDSKDSTYSLSSTLTLSKADYEKHK.V	N	99.43	4490.12	1.3	899.033	5	64.15
sp|Humira-LC|	K.SGTASVVC(+57.02)LLNNFYPREAK.V	N	98.15	2125.06	1.6	709.363	3	104.26
sp|Humira-LC|	R.N(+.98)YLAWYQQKPGK.A	Y	97.65	1495.75	0.1	748.88	2	64.87
sp|Humira-LC|	K.LLIYAASTLQSGVPSR.F	Y	96.99	1674.93	0	838.472	2	76.99
sp|Humira-LC|	R.NYLAWYQQKPGK.A	Y	95.57	1494.76	0.4	748.389	2	53.07
sp|Humira-LC|	R.YNRAPYTFGQGTK.V	Y	94.75	1501.73	0.4	501.585	3	29.78
sp|Humira-LC|	K.SGTASVVC(+57.02)LLN(+.98)N(+.98)FYPR.E	N	91.37	1798.86	-0.9	900.434	2	97.57
sp|Humira-LC|	R.YNRAPYTFGQGTKVEIK.R	Y	88.48	1971.02	1.5	493.763	4	47.63
sp|Humira-LC|	DIQMTQ(+.98)SPSSLSASVGDR.V	N	87.47	1878.86	4.3	940.443	2	58.83
sp|Humira-LC|	R.APYTFGQGTKVEIKR.T	Y	83.14	1693.91	0.3	565.646	3	40.23
sp|Humira-LC|	R.NYLAWYQQKPGKAPK.L	Y	82.06	1790.95	-0.1	448.744	4	46.45
sp|Humira-LC|	K.VDNALQ(+.98)SGNSQ(+.98)ESVTEQDSK.D	N	81.97	2136.93	4.6	1069.48	2	23.19
sp|Humira-LC|	R.ASQGIRNYLAWYQQKPGKAPK.L	Y	81.85	2403.28	-0.2	601.827	4	60.8
sp|Humira-LC|	K.ADYEKHKVYAC(+57.02)EVTHQGLSSPVTK.S	N	80.88	2746.34	-0.9	550.274	5	47.72
sp|Humira-LC|	R.APYTFGQGTK.V	Y	80.15	1068.52	0.4	535.269	2	26.51
sp|Humira-LC|	R.TVAAPSVFIFPPSDEQLKSGTASVVC(+57.02)LLNNFYPREAKVQWK.V	N	78.84	4593.37	-0.3	919.682	5	143.14
sp|Humira-LC|	DIQM(+15.99)TQSPSSLSASVGDRVTITC(+57.02)R.A	N	77.96	2624.25	0.4	875.759	3	65.17
sp|Humira-LC|	R.NYLAWYQQ(+.98)KPGK.A	Y	77.68	1495.75	1.4	748.881	2	54.99
sp|Humira-LC|	R.APYTFGQGTKVEIK.R	Y	74.23	1537.81	0.3	513.612	3	48.85
sp|Humira-LC|	R.APYTFGQ(+.98)GTK.V	Y	73.77	1069.51	0.7	535.762	2	28.59
sp|Humira-LC|	R.NYLAWYQ(+.98)QKPGK.A	Y	73.12	1495.75	0.1	748.88	2	55.88
sp|Humira-LC|	R.NYLAWYQ(+.98)QKPGKAPKLLIYAASTLQSGVPSR.F	Y	72.24	3448.85	2.7	863.222	4	106.48
sp|Humira-LC|	K.VDNALQSGNSQESVTEQ(+.98)DSKDSTYSLSSTLTLSK.A	N	57.92	3619.69	4.6	905.933	4	73.17
sp|Humira-LC|	R.APYTFGQGTKVEIKRTVAAPSVFIFPPSDEQLK.S	Y	55.12	3620.92	1.3	725.193	5	96.47
sp|Humira-LC|	DIQ(+.98)M(+15.99)TQSPSSLSASVGDR.V	N	53.7	1894.86	4.6	948.441	2	42.44
sp|Humira-LC|	K.VQWKVDNALQSGNSQESVTEQDSKDSTYSLSSTLTLSK.A	N	53.12	4160	2.3	1041.01	4	82.81
sp|Humira-LC|	R.ASQGIRNYLAWYQQKPGK.A	Y	52.94	2107.1	2.4	527.783	4	66.26
sp|Humira-LC|	R.YN(+.98)RAPYTFGQGTK.V	Y	51.07	1502.72	-0.7	501.912	3	31.89
sp|Humira-LC|	R.FSGSGSGTDFTLTISSLQ(+.98)PEDVATYYC(+57.02)QR.Y	Y	46.23	3187.43	3.7	797.867	4	155.25
sp|Humira-LC|	K.RTVAAPSVFIFPPSDEQLKSGTASVVC(+57.02)LLNNFYPREAK.V	N	44.58	4208.17	2.9	842.644	5	138.53
sp|Humira-LC|	R.ASQGIRN(+.98)YLAWYQQKPGK.A	Y	39.57	2108.08	-0.5	528.027	4	71.23
